# Supplementary material for: Antioxidant Properties of Gluten-Free Pasta Enriched with Vegetable By-Products
Source: MDPI journal article supplement (doi:10.3390/molecules27248993), 2022-12-16
Supplement: s1 [file s1]

**Table S1.** Composition of carotenoids and tocols (mean  $\pm$  standard deviation; mg/kg DM) in pasta prepared with rice and faba bean flours (Control) or enriched with different percentages of tomato waste (TP) or linseed meal (LI).

|                              | Control                      | 10% TP                       | 15% TP                        | 10% LI                        | 15% LI                       |
|------------------------------|------------------------------|------------------------------|-------------------------------|-------------------------------|------------------------------|
| <i>Carotenoids</i>           |                              |                              |                               |                               |                              |
| Lycopene + $\beta$ -carotene | 0.09 <sup>c</sup> $\pm$ 0.03 | 0.48 <sup>b</sup> $\pm$ 0.01 | 0.61 <sup>a</sup> $\pm$ 0.03  | 0.06 <sup>c</sup> $\pm$ 0.01  | 0.06 <sup>c</sup> $\pm$ 0.00 |
| $\beta$ -cryptoxanthin       | 0.06 $\pm$ 0.01              | 0.05 $\pm$ 0.00              | 0.06 $\pm$ 0.01               | 0.05 $\pm$ 0.01               | 0.05 $\pm$ 0.00              |
| Lutein                       | 0.93 <sup>a</sup> $\pm$ 0.01 | 0.65 <sup>b</sup> $\pm$ 0.03 | 0.68 <sup>b</sup> $\pm$ 0.02  | 0.80 <sup>ab</sup> $\pm$ 0.12 | 0.76 <sup>b</sup> $\pm$ 0.03 |
| Zeaxanthin                   | 0.09 $\pm$ 0.00              | 0.04 $\pm$ 0.01              | 0.06 $\pm$ 0.01               | 0.12 $\pm$ 0.11               | 0.04 $\pm$ 0.00              |
| <i>Tocols</i>                |                              |                              |                               |                               |                              |
| $\alpha$ -tocopherol         | nd                           | 0.34 $\pm$ 0.32              | 0.94 $\pm$ 0.02               | nd                            | nd                           |
| $\beta$ -tocopherol          | nd                           | 0.39 $\pm$ 0.25              | 0.50 $\pm$ 0.05               | nd                            | nd                           |
| $\beta$ -tocotrienol         | nd                           | nd                           | nd                            | 4.93 <sup>b</sup> $\pm$ 0.25  | 8.35 <sup>a</sup> $\pm$ 0.47 |
| $\gamma$ -tocopherol         | 6.55 <sup>c</sup> $\pm$ 0.20 | 7.22 <sup>c</sup> $\pm$ 0.59 | 10.27 <sup>a</sup> $\pm$ 0.47 | 7.40 <sup>c</sup> $\pm$ 0.23  | 8.81 <sup>b</sup> $\pm$ 0.61 |
| $\gamma$ -tocotrienol        | 0.85 $\pm$ 0.01              | 0.70 $\pm$ 0.14              | 0.55 $\pm$ 0.14               | 0.82 $\pm$ 0.04               | 0.70 $\pm$ 0.11              |
| $\delta$ -tocotrienol        | nd                           | 0.48 $\pm$ 0.12              | 0.55 $\pm$ 0.08               | nd                            | nd                           |

nd, lower than the detection limit.

**Table S2.** Composition (mean  $\pm$  standard deviation) of soluble free and insoluble bound polyphenols; mg/kg DM) in pasta prepared with rice and fava bean flours (Control) or enriched with different percentages of tomato waste (TP) or linseed meal (LI).

|                               | Control                      | 10% TP                        | 15% TP                        | 10% LI                        | 15% LI                        |
|-------------------------------|------------------------------|-------------------------------|-------------------------------|-------------------------------|-------------------------------|
| <b>Soluble free phenolics</b> |                              |                               |                               |                               |                               |
| <i>Phenolic acids</i>         |                              |                               |                               |                               |                               |
| Protocatechuic                | 15.94 $\pm$ 0.89             | 19.35 $\pm$ 2.03              | 19.36 $\pm$ 1.97              | 15.52 $\pm$ 0.28              | 18.69 $\pm$ 0.57              |
| 4-hydroxybenzoic              | 0.54 <sup>c</sup> $\pm$ 0.03 | 1.21 <sup>b</sup> $\pm$ 0.08  | 1.80 <sup>a</sup> $\pm$ 0.31  | 1.58 <sup>ab</sup> $\pm$ 0.38 | 1.19 <sup>b</sup> $\pm$ 0.03  |
| Syringic                      | 1.77 <sup>d</sup> $\pm$ 0.33 | 6.65 <sup>b</sup> $\pm$ 0.33  | 11.73 <sup>a</sup> $\pm$ 0.13 | 2.17 <sup>cd</sup> $\pm$ 0.10 | 2.48 <sup>c</sup> $\pm$ 0.07  |
| <i>p</i> -coumaric            | 0.16 $\pm$ 0.01              | 0.15 $\pm$ 0.05               | 0.21 $\pm$ 0.09               | nd                            | nd                            |
| Ferulic                       | 0.96 <sup>b</sup> $\pm$ 0.15 | 1.69 <sup>a</sup> $\pm$ 0.09  | 2.19 <sup>a</sup> $\pm$ 0.23  | nd                            | nd                            |
| <i>Flavonoids</i>             |                              |                               |                               |                               |                               |
| Catechin                      | 30.5 <sup>c</sup> $\pm$ 1.1  | 45.7 <sup>b</sup> $\pm$ 0.1   | 44.7 <sup>b</sup> $\pm$ 0.2   | 48.9 <sup>a</sup> $\pm$ 0.8   | 49.8 <sup>a</sup> $\pm$ 1.7   |
| Epicatechin                   | 2.28 $\pm$ 0.24              | 1.90 $\pm$ 0.10               | 1.78 $\pm$ 0.36               | 2.05 $\pm$ 0.28               | 2.44 $\pm$ 0.20               |
| Rutin                         | nd                           | 0.66 <sup>b</sup> $\pm$ 0.04  | 3.74 <sup>a</sup> $\pm$ 0.44  | nd                            | nd                            |
| Quercetin                     | nd                           | 1.08 <sup>b</sup> $\pm$ 0.02  | 1.40 <sup>a</sup> $\pm$ 0.04  | nd                            | nd                            |
| Naringenin                    | nd                           | 5.83 <sup>b</sup> $\pm$ 0.12  | 10.46 <sup>a</sup> $\pm$ 0.48 | nd                            | nd                            |
| Tyrosol                       | 5.96 <sup>c</sup> $\pm$ 0.77 | 17.24 <sup>b</sup> $\pm$ 1.68 | 26.05 <sup>a</sup> $\pm$ 2.36 | 28.58 <sup>a</sup> $\pm$ 1.16 | 29.23 <sup>a</sup> $\pm$ 1.75 |
| <b>Insoluble bound</b>        |                              |                               |                               |                               |                               |
| <i>Phenolic acids</i>         |                              |                               |                               |                               |                               |
| Protocatechuic                | 1.78 <sup>c</sup> $\pm$ 0.31 | 2.38 <sup>c</sup> $\pm$ 0.54  | 2.65 <sup>c</sup> $\pm$ 0.38  | 23.26 <sup>b</sup> $\pm$ 0.41 | 38.04 <sup>a</sup> $\pm$ 0.06 |
| 4-hydroxybenzoic              | 1.86 <sup>c</sup> $\pm$ 0.08 | 5.16 <sup>a</sup> $\pm$ 0.91  | 6.34 <sup>a</sup> $\pm$ 0.10  | 2.95 <sup>bc</sup> $\pm$ 1.56 | 4.41 <sup>ab</sup> $\pm$ 0.12 |
| Caffeic                       | 0.17 <sup>b</sup> $\pm$ 0.14 | 0.87 <sup>b</sup> $\pm$ 0.08  | 2.20 <sup>a</sup> $\pm$ 0.88  | 0.65 <sup>b</sup> $\pm$ 0.31  | 1.08 <sup>b</sup> $\pm$ 0.02  |
| <i>p</i> -coumaric            | 0.57 <sup>d</sup> $\pm$ 0.06 | 1.11 <sup>bc</sup> $\pm$ 0.02 | 1.67 <sup>a</sup> $\pm$ 0.16  | 0.87 <sup>cd</sup> $\pm$ 0.43 | 1.47 <sup>ab</sup> $\pm$ 0.00 |
| Sinapic                       | 0.06 <sup>c</sup> $\pm$ 0.04 | 0.28 <sup>bc</sup> $\pm$ 0.12 | 0.42 <sup>bc</sup> $\pm$ 0.18 | 0.79 <sup>b</sup> $\pm$ 0.56  | 1.92 <sup>a</sup> $\pm$ 0.02  |
| Ferulic                       | 91.4 <sup>c</sup> $\pm$ 1.7  | 67.7 <sup>d</sup> $\pm$ 1.3   | 67.1 <sup>d</sup> $\pm$ 0.5   | 102.3 <sup>b</sup> $\pm$ 1.4  | 115.4 <sup>a</sup> $\pm$ 0.3  |
| Cinnamic derivative           | 0.62 <sup>c</sup> $\pm$ 0.04 | 4.69 <sup>b</sup> $\pm$ 0.34  | 6.89 <sup>a</sup> $\pm$ 0.36  | 0.94 <sup>c</sup> $\pm$ 0.03  | 0.67 <sup>c</sup> $\pm$ 0.04  |
| <i>Flavonoids</i>             |                              |                               |                               |                               |                               |
| Epicatechin                   | 1.07 <sup>c</sup> $\pm$ 0.01 | 1.89 <sup>b</sup> $\pm$ 0.63  | 4.16 <sup>a</sup> $\pm$ 0.29  | 2.45 <sup>b</sup> $\pm$ 0.09  | 4.74 <sup>a</sup> $\pm$ 0.13  |
| Quercetin                     | 1.05 <sup>c</sup> $\pm$ 0.17 | 9.87 <sup>b</sup> $\pm$ 0.78  | 17.12 <sup>a</sup> $\pm$ 2.00 | 1.77 <sup>c</sup> $\pm$ 0.08  | 0.58 <sup>c</sup> $\pm$ 0.05  |
| Naringenin                    | 0.10 <sup>c</sup> $\pm$ 0.09 | 12.53 <sup>b</sup> $\pm$ 1.07 | 22.32 <sup>a</sup> $\pm$ 2.17 | 2.01 <sup>c</sup> $\pm$ 0.70  | 0.34 <sup>c</sup> $\pm$ 0.04  |
| <i>Stilbenes</i>              |                              |                               |                               |                               |                               |
| Resveratrol derivative        | 2.80 $\pm$ 0.06              | 2.18 $\pm$ 0.02               | 2.35 $\pm$ 0.01               | 2.35 $\pm$ 0.50               | 2.41 $\pm$ 0.00               |
| Resveratrol                   | 4.27 $\pm$ 0.25              | 3.31 $\pm$ 0.13               | 3.43 $\pm$ 0.03               | 4.23 $\pm$ 0.27               | 4.62 $\pm$ 0.08               |

nd, lower than the detection limit.

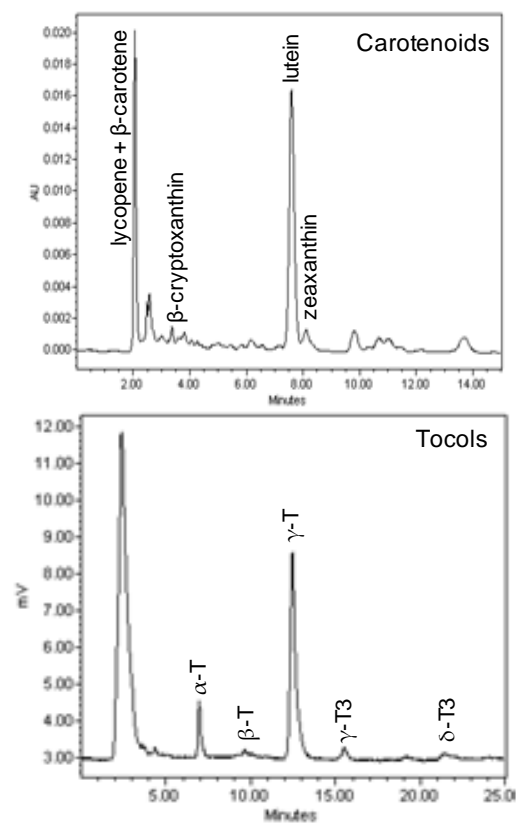

**Figure S1.** HPLC chromatograms of carotenoids and tocols in the pasta sample enriched with 15% of tomato pomace. T, tocopherol; T3, tocotrienol.

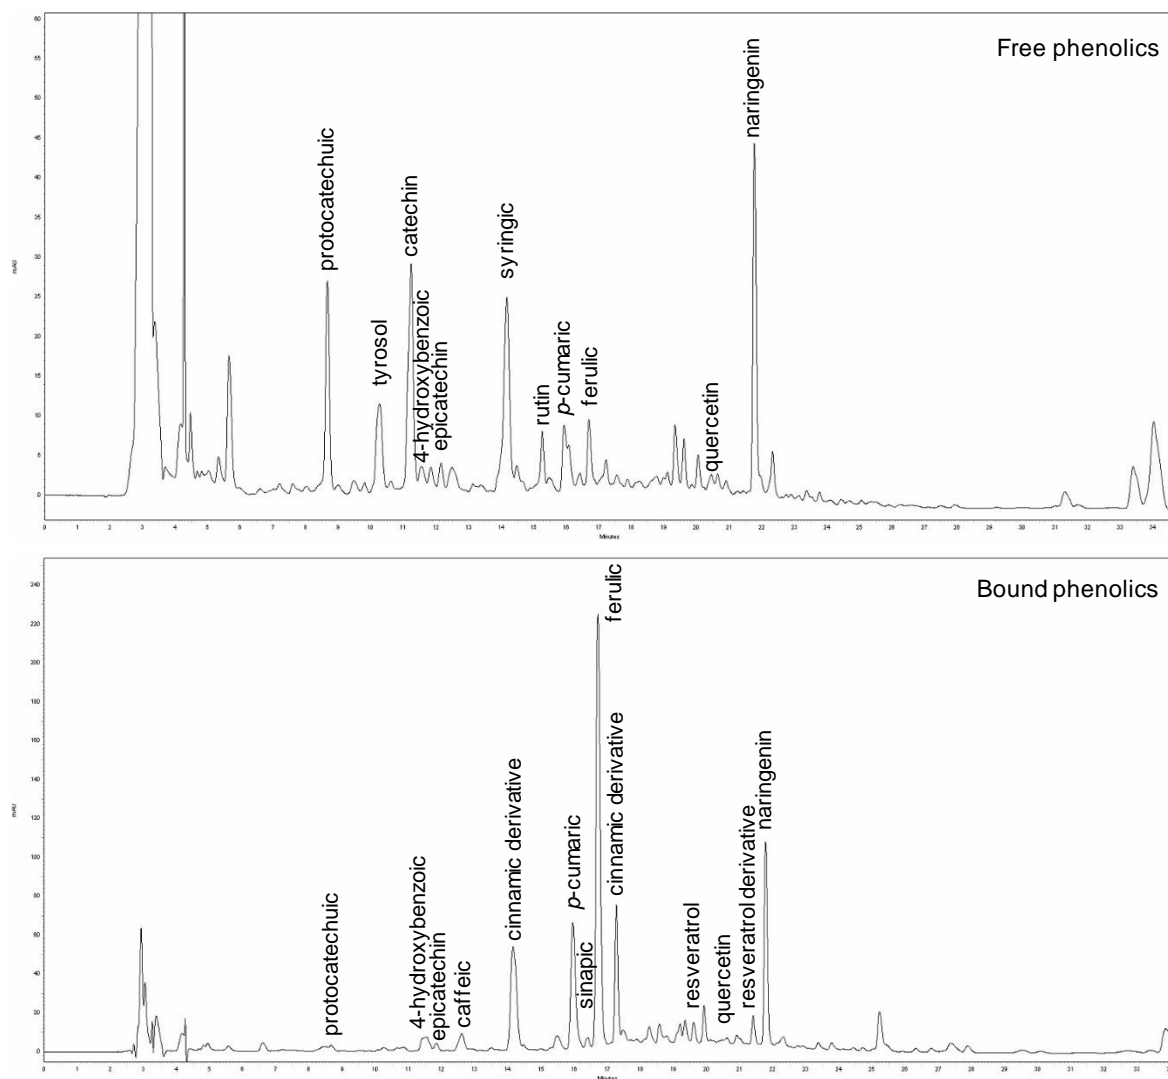

**Figure S2.** HPLC chromatograms at 280 nm of the free and bound phenolics in the pasta sample enriched with 15% of tomato pomace. Caffeic, sinapic and resveratrol are read at 320 nm while rutin and quercetin at 360 nm.
